# Supplementary material
Source: PubMed Central journal article supplement (PMC3740941)

**LIST OF SUPPLEMENTAL ITEMS:**

**SUPPLEMENTAL FIGURES**

**Figure S1. Dynamic DNA methylation of imprinted DMRs in the context of global de novo methylation, related to Figure 1**

**Figure S2. Broad low-level intergenic transcription occurs in prospermatogonia, related to Figure 2**

**Figure S3. Transcription initiates from maternally methylated DMRs in fetal male germ cells, related to Figure 3**

**Figure S4. Chromatin landscape of control regions, related to Figure 4**

**Figure S5. DMRs of imprinted genes follow the general epigenetic remodeling pattern in fetal MGC, related to Figure 5**

**Figure S6. Germ line DMRs lack H3K79me3, H3K9me3, and H3K36me3 marks in female and male fetal germ cells at 15.5 dpc, related to Figure 6**

## **SUPPLEMENTAL TABLES**

**Table S1. Results of the RNA-seq experiment, related to Figure 1D.**

**Table S2. Statistics of the genome-wide transcription in MGC, related to Figure 2**

**Table S3. Summary of transcription patterns at all known MAT DMRs, related to**

**Table S4. List of CpG island methylation classes and categories, related to Figure 4**

## **SUPPLEMENTAL EXPERIMENTAL PROCEDURES**

**Purification of germ cells**

**Genomic DNA extraction from germ cells and sperm**

**Chromatin Immunoprecipitation**

**Bioinformatics Analysis**

**RNA-seq analysis:**

**Normalization of microarray results**

**Peak finding**

**Heat maps**

**Composite Profile**

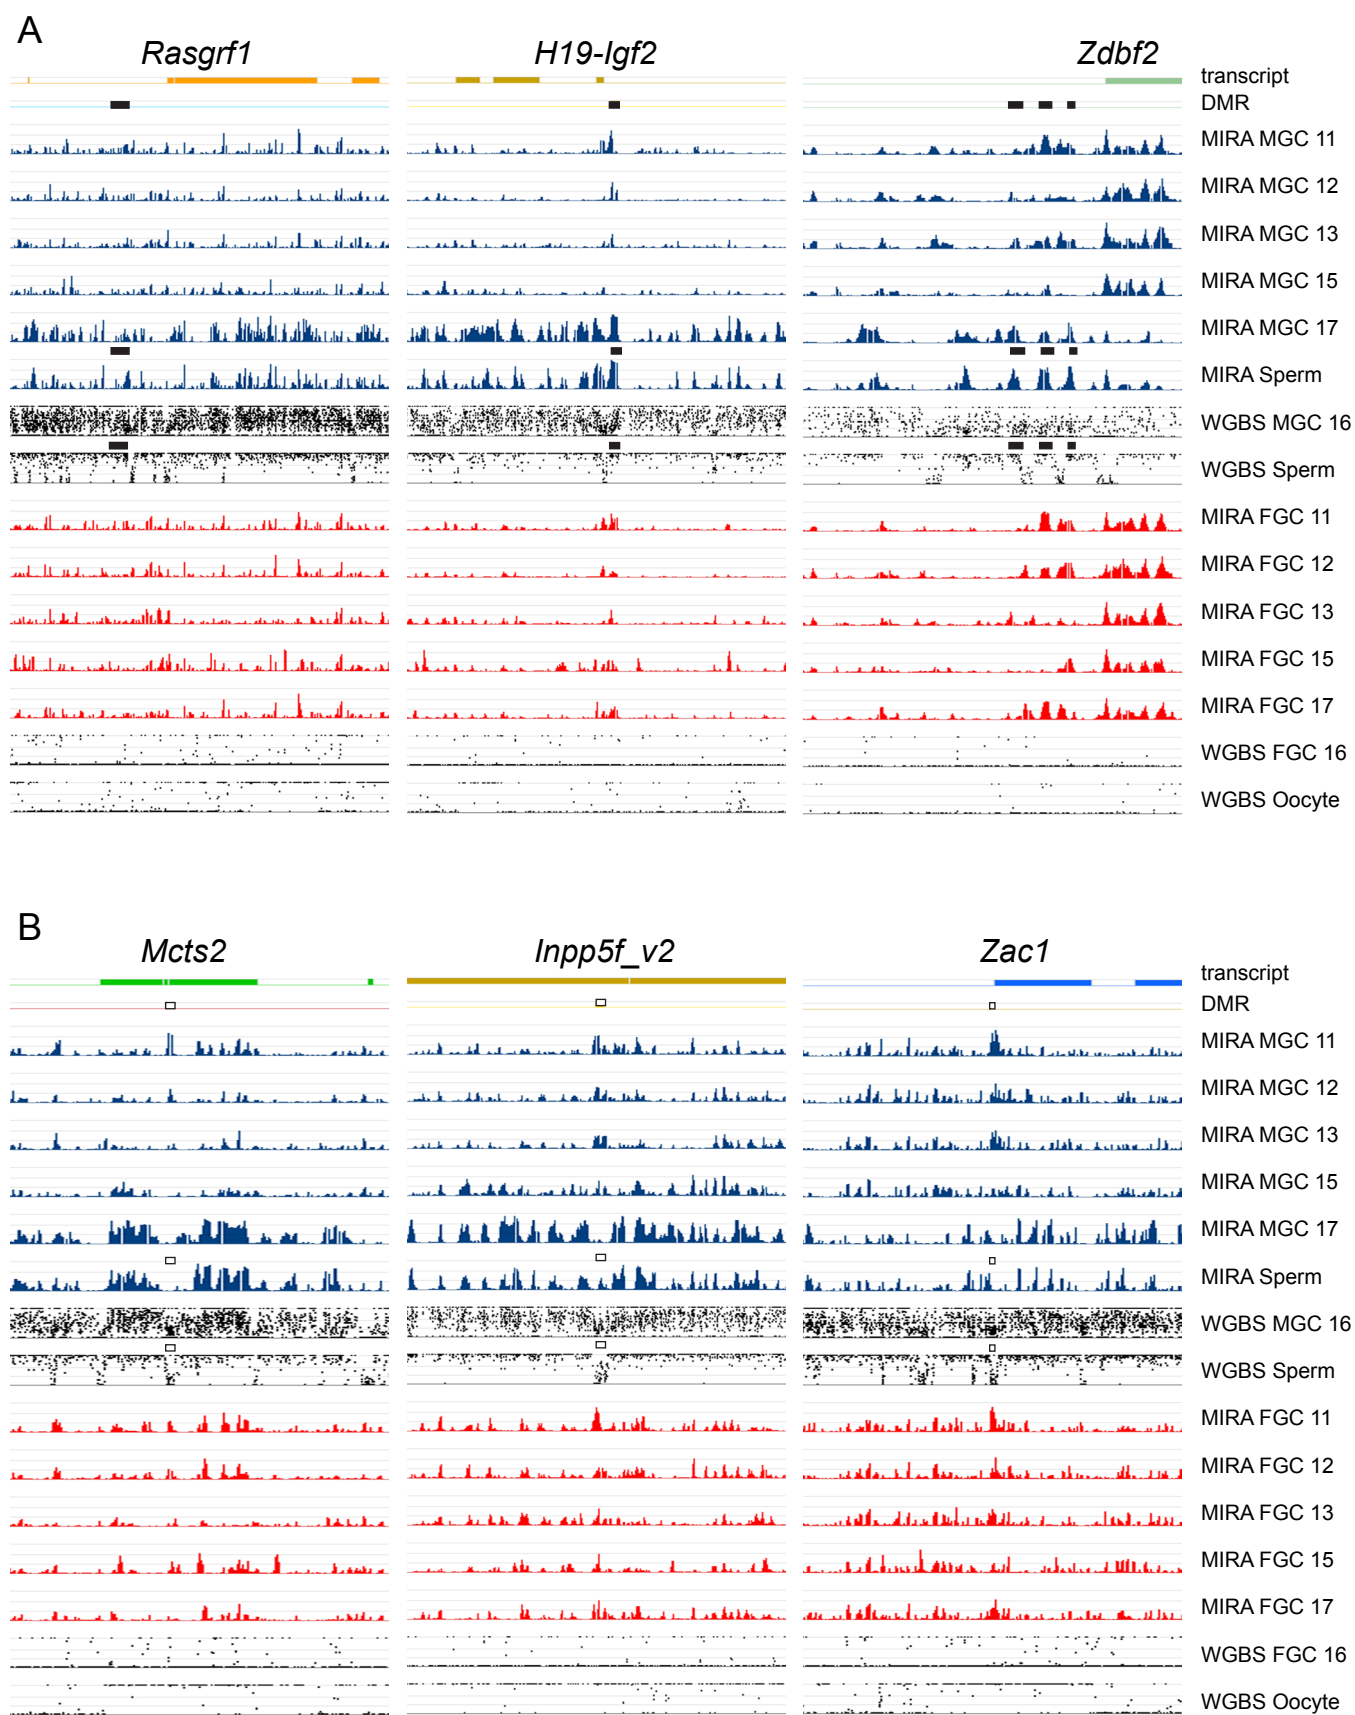

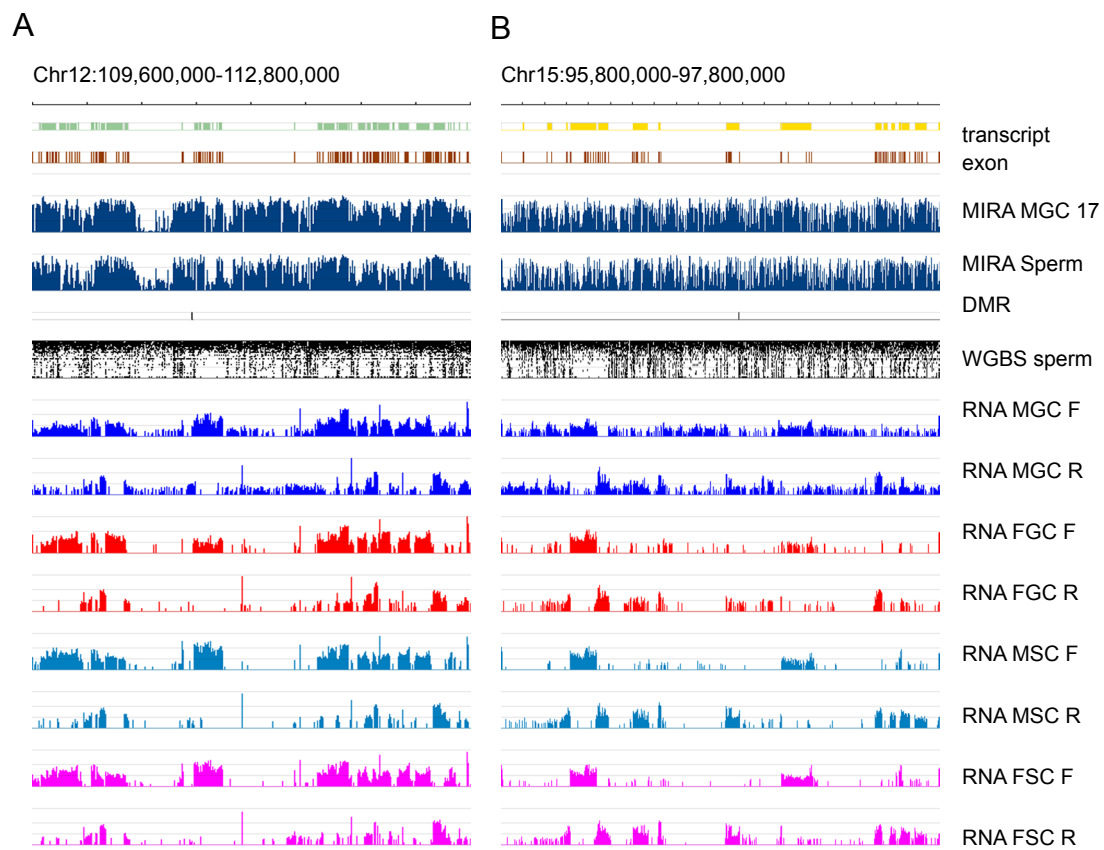

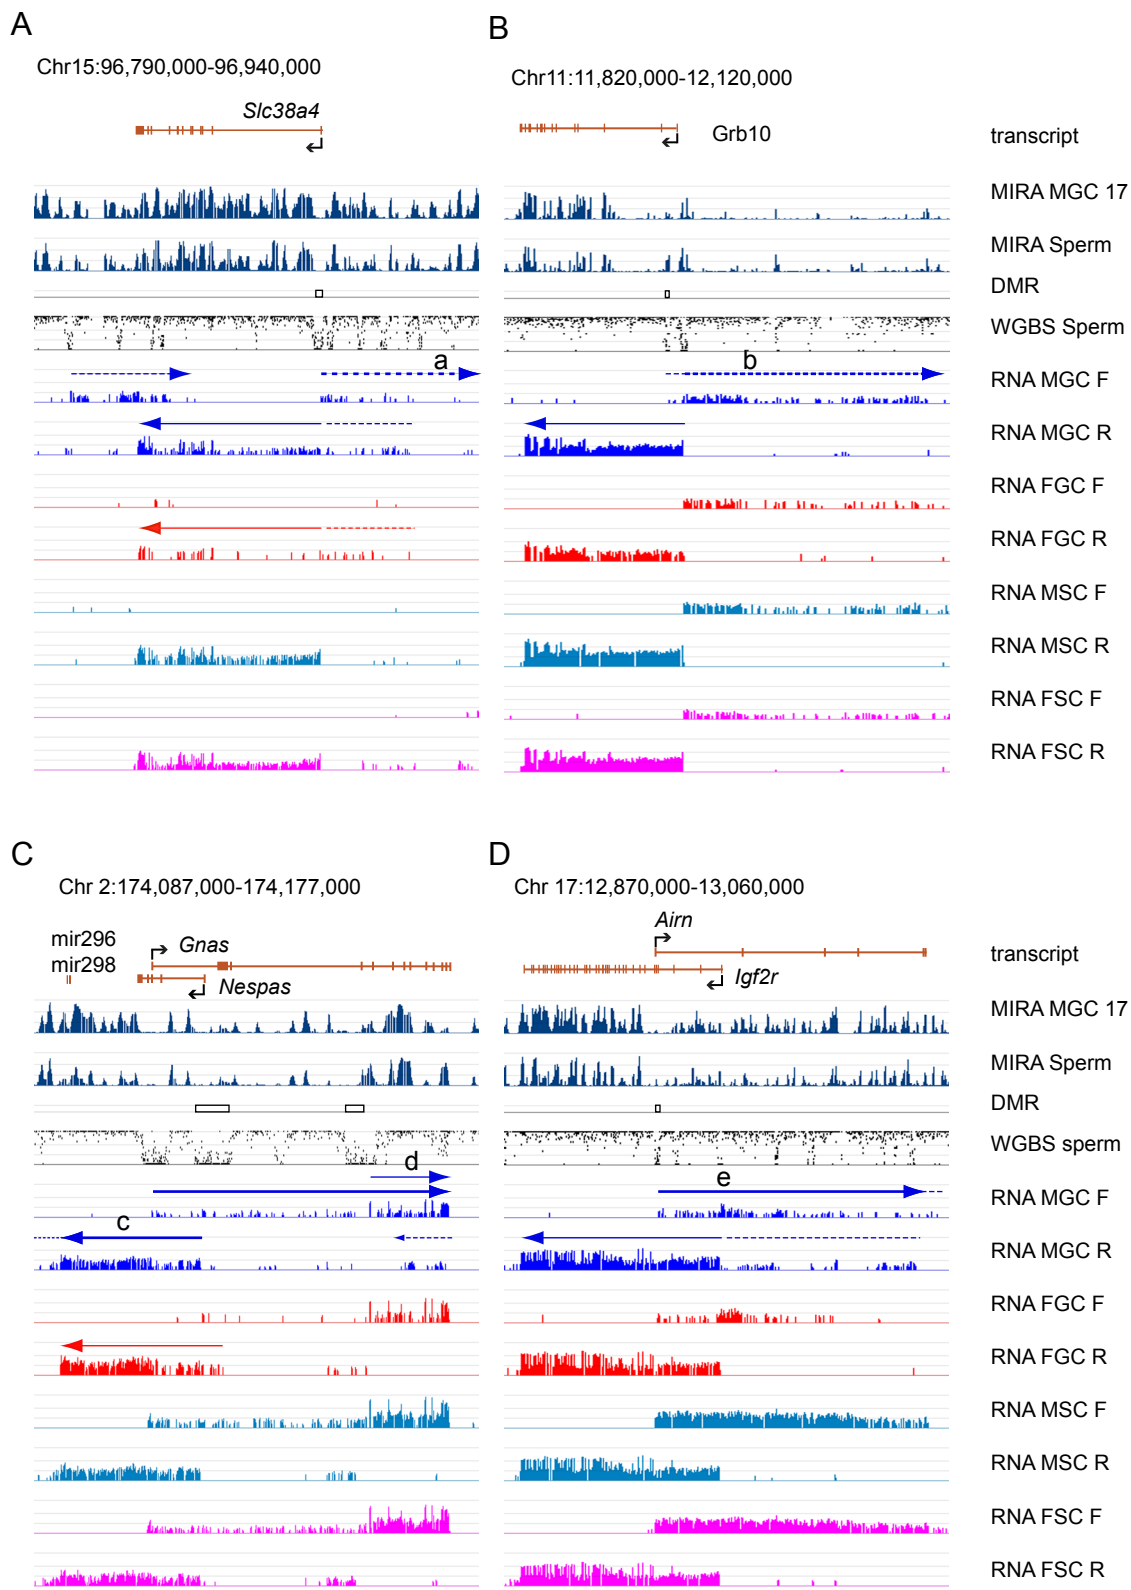

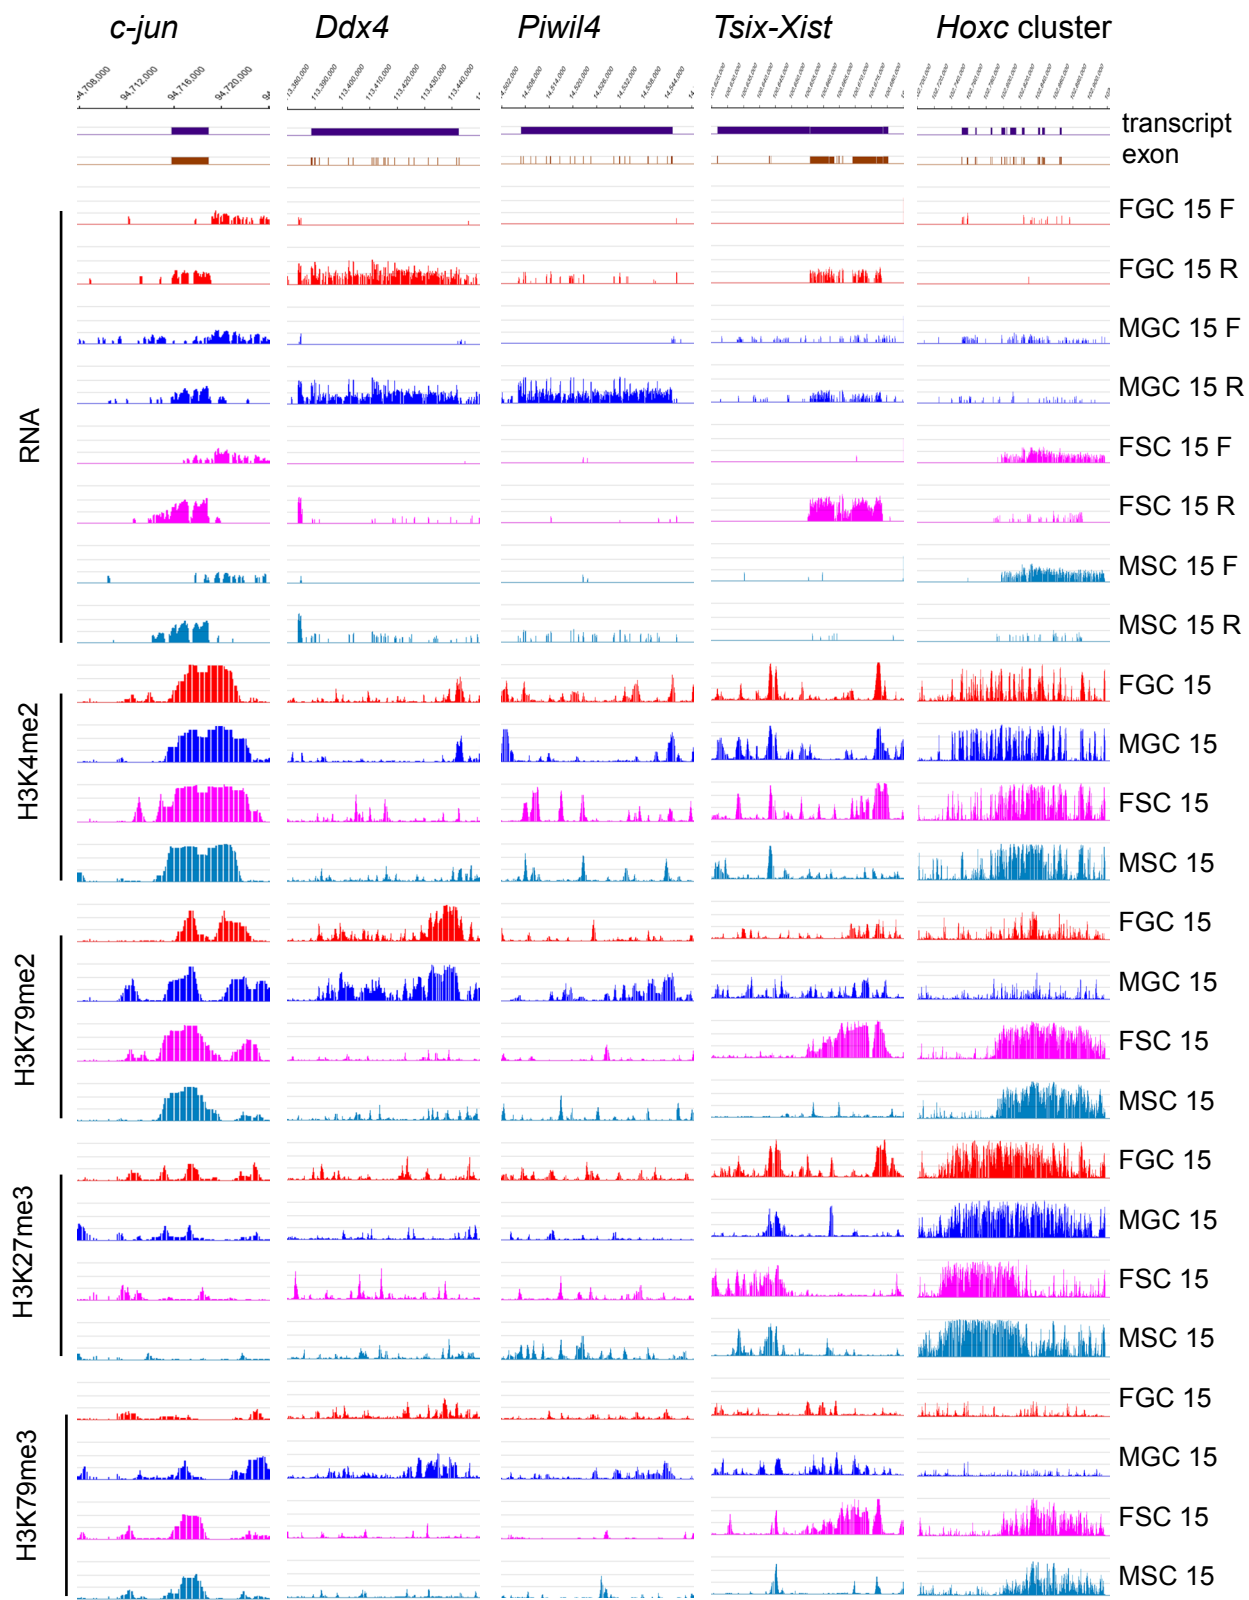





A

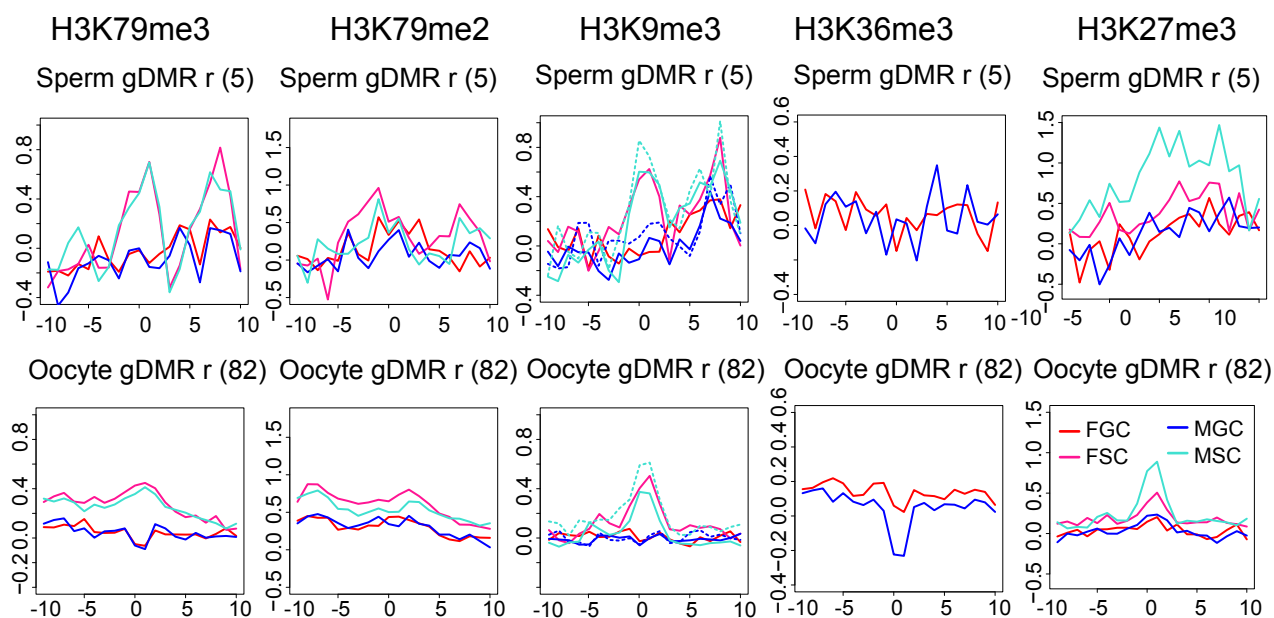

B

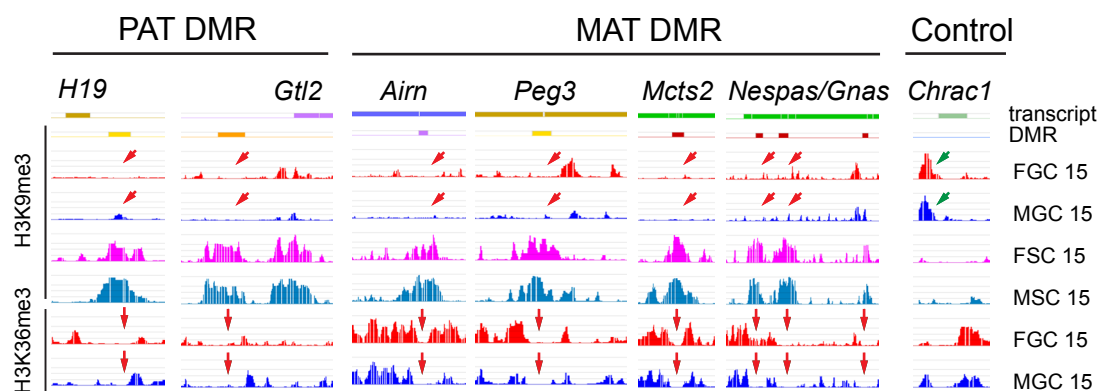

C

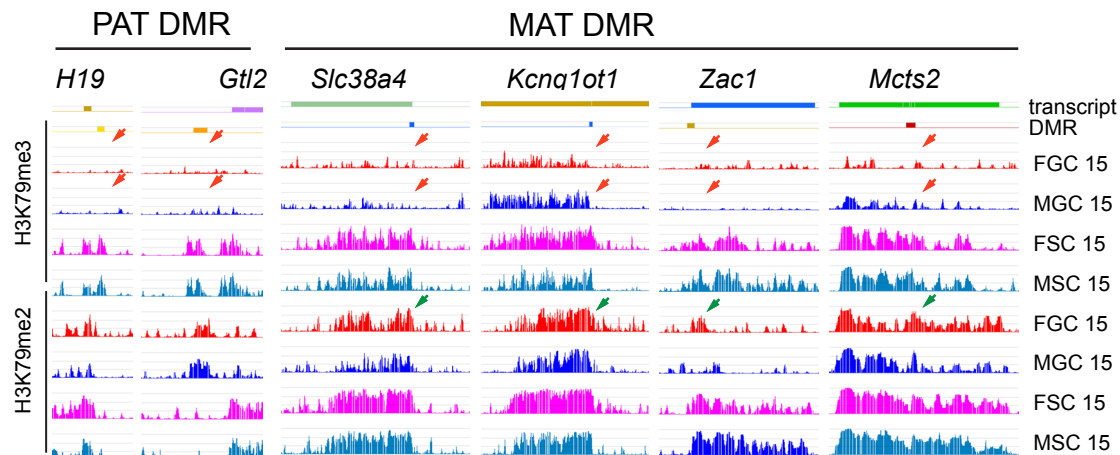

Supplement: NIHMS491435-supplement-01.pdf [file NIHMS491435-supplement-01.pdf]
